# Supplementary material for: Cytotoxicity Study of UV-Laser-Irradiated PLLA Surfaces Subjected to Bio-Ceramisation: A New Way towards Implant Surface Modification
Source: MDPI journal article supplement (doi:10.3390/ijms22168436), 2021-08-05
Supplement: s1 [file s1]

# Cytotoxicity Study of UV-Laser-Irradiated PLLA Surfaces Subjected to Bio-Ceramisation: A New Way towards Implant Surface Modification

Konrad Szustakiewicz <sup>1,\*</sup>, Bartłomiej Kryszak <sup>1,\*</sup>, Paulina Dzienny <sup>2</sup>, Błażej Poźniak <sup>3</sup>, Marta Tikhomirov <sup>3</sup>, Viktoria Hoppe <sup>4</sup>, Patrycja Szymczyk-Ziółkowska <sup>4</sup>, Włodzimierz Tylus <sup>5</sup>, Michał Grzymajło <sup>1</sup>, Agnieszka Gadomska-Gajadur <sup>6</sup> and Arkadiusz J. Antończak <sup>2</sup>

<sup>1</sup> Department of Polymer Engineering and Technology, Faculty of Chemistry, Wrocław University of Science and Technology (WUST), Wyb. Wyspiańskiego 27, 50-370 Wrocław, Poland; [michal.grzymajlo@pwr.edu.pl](mailto:michal.grzymajlo@pwr.edu.pl)

<sup>2</sup> Laser and Fiber Electronics Group, Faculty of Electrical Engineering, Wrocław University of Science and Technology, 50-370, Wrocław, Poland;

[paulina.dzienny@pwr.edu.pl](mailto:paulina.dzienny@pwr.edu.pl) (P.D.); [arkadiusz.antonczak@pwr.edu.pl](mailto:arkadiusz.antonczak@pwr.edu.pl) (A.A.)

<sup>3</sup> Department of Pharmacology and Toxicology, Faculty of Veterinary Medicine, Wrocław University of Environmental and Life Sciences, ul. Norwida 25, 50-375 Wrocław, Poland;

[blazej.pozniak@upwr.edu.pl](mailto:blazej.pozniak@upwr.edu.pl) (B.P.); [marta.tikhomirov@upwr.edu.pl](mailto:marta.tikhomirov@upwr.edu.pl) (M.T.)

<sup>4</sup> Centre for Advanced Manufacturing Technologies, Faculty of Mechanical Engineering, Wrocław University of Science and Technology (WUST), Łukasiewicza 5, 50-370 Wrocław, Poland;

[viktoria.hoppe@pwr.edu.pl](mailto:viktoria.hoppe@pwr.edu.pl) (V.H.); [patrycja.e.szymczyk@pwr.edu.pl](mailto:patrycja.e.szymczyk@pwr.edu.pl) (P.S.-Z.)

<sup>5</sup> Department of Advanced Material Technologies, Faculty of Chemistry, Wrocław University of Science and Technology, 50-370, Wrocław, Poland;

[wlodzimierz.tylus@pwr.edu.pl](mailto:wlodzimierz.tylus@pwr.edu.pl)

<sup>6</sup> Faculty of Chemistry, Warsaw University of Technology, ul. Noakowskiego 3, 00-664 Warsaw, Poland;

[agadomska@ch.pw.edu.pl](mailto:agadomska@ch.pw.edu.pl)

\* Correspondence: [konrad.szustakiewicz@pwr.edu.pl](mailto:konrad.szustakiewicz@pwr.edu.pl) (K.S.); [bartlomiej.kryszak@pwr.edu.pl](mailto:bartlomiej.kryszak@pwr.edu.pl) (B.K.)

## Supporting Info

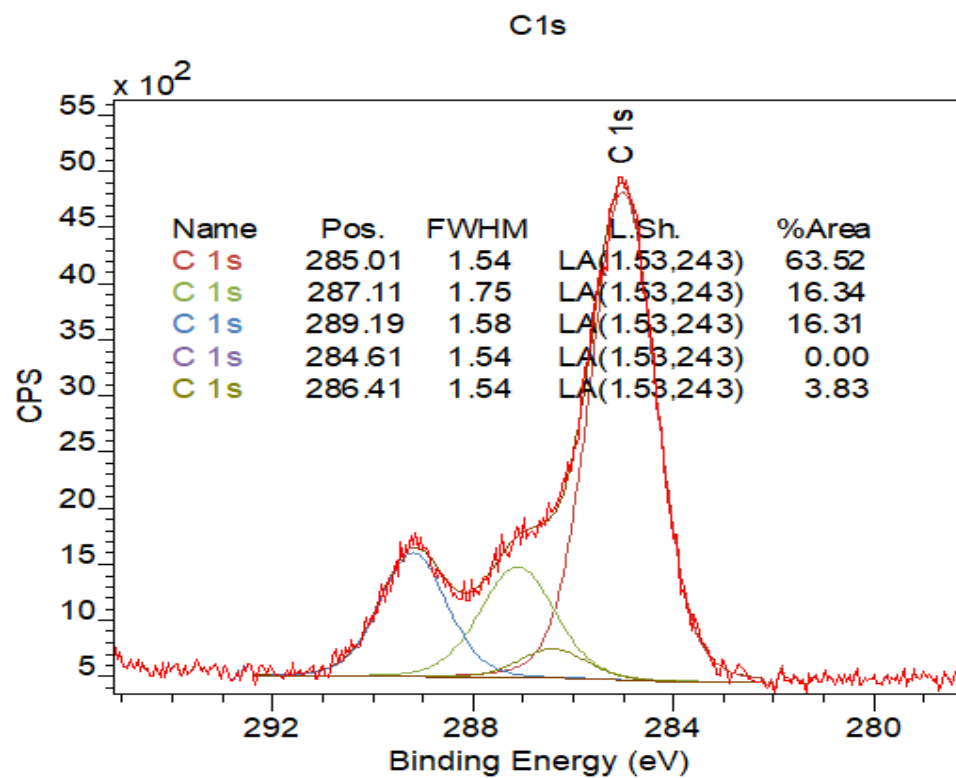

CasaXPS (This string can be edited in CasaXPS.DEF/PrintFootNc

Figure S1. XPS C1s spectra of PLLA foil

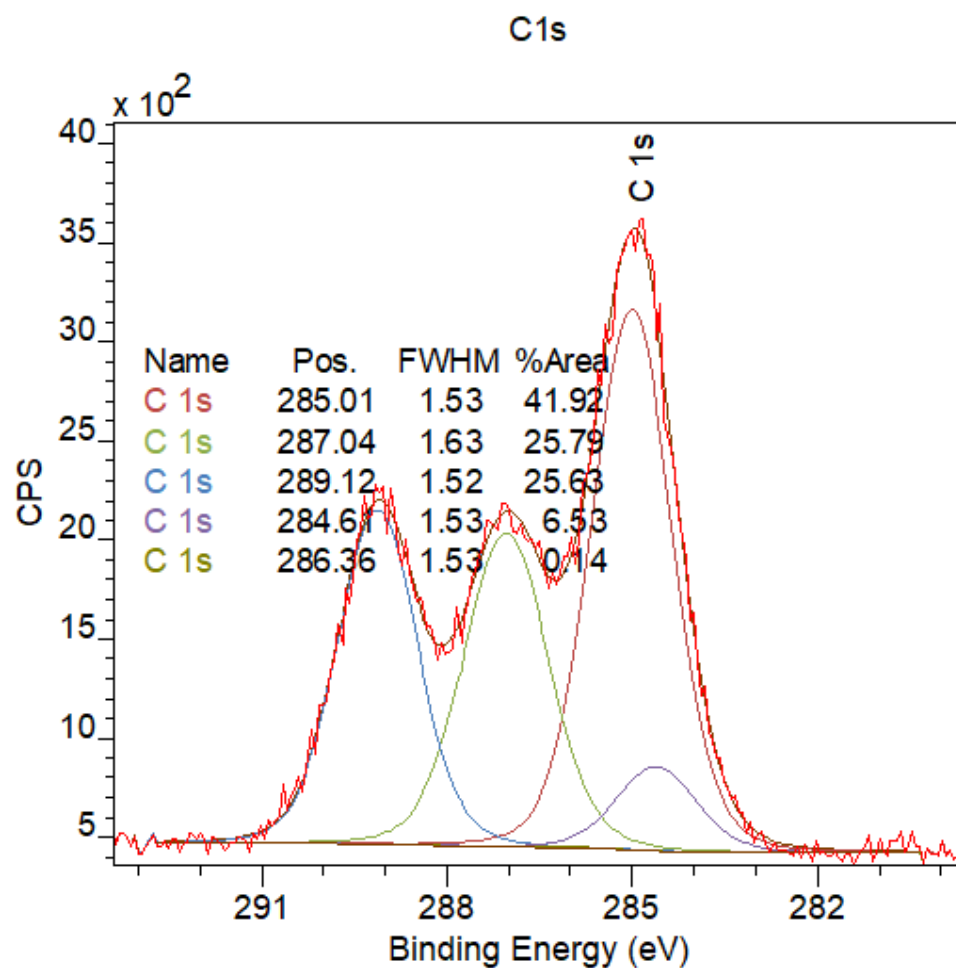

CasaXPS (This string can be edited in CasaXPS.DEF/PrintFootNc

Figure S2. XPS C1s spectra of PLLA\_UV\_1d

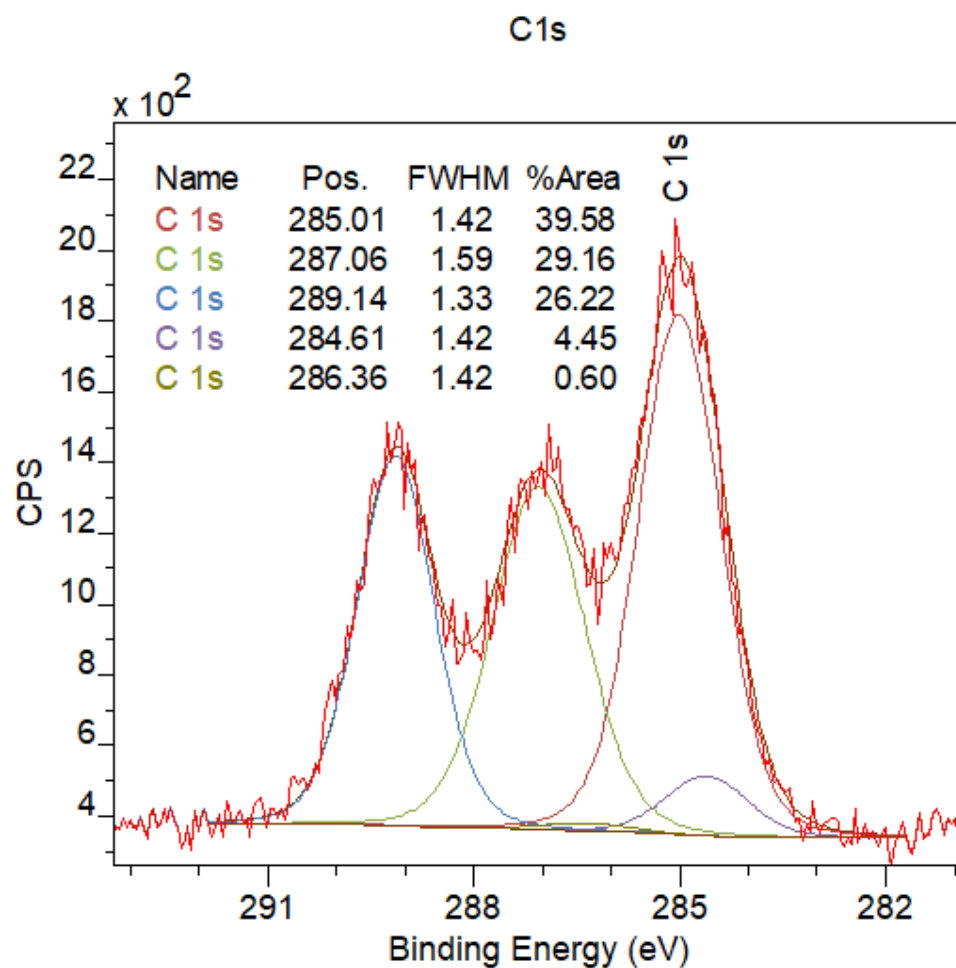

CasaXPS (This string can be edited in CasaXPS.DEF/PrintFootNc

Figure S3. XPS C1s spectra of PLLA\_UV\_7d

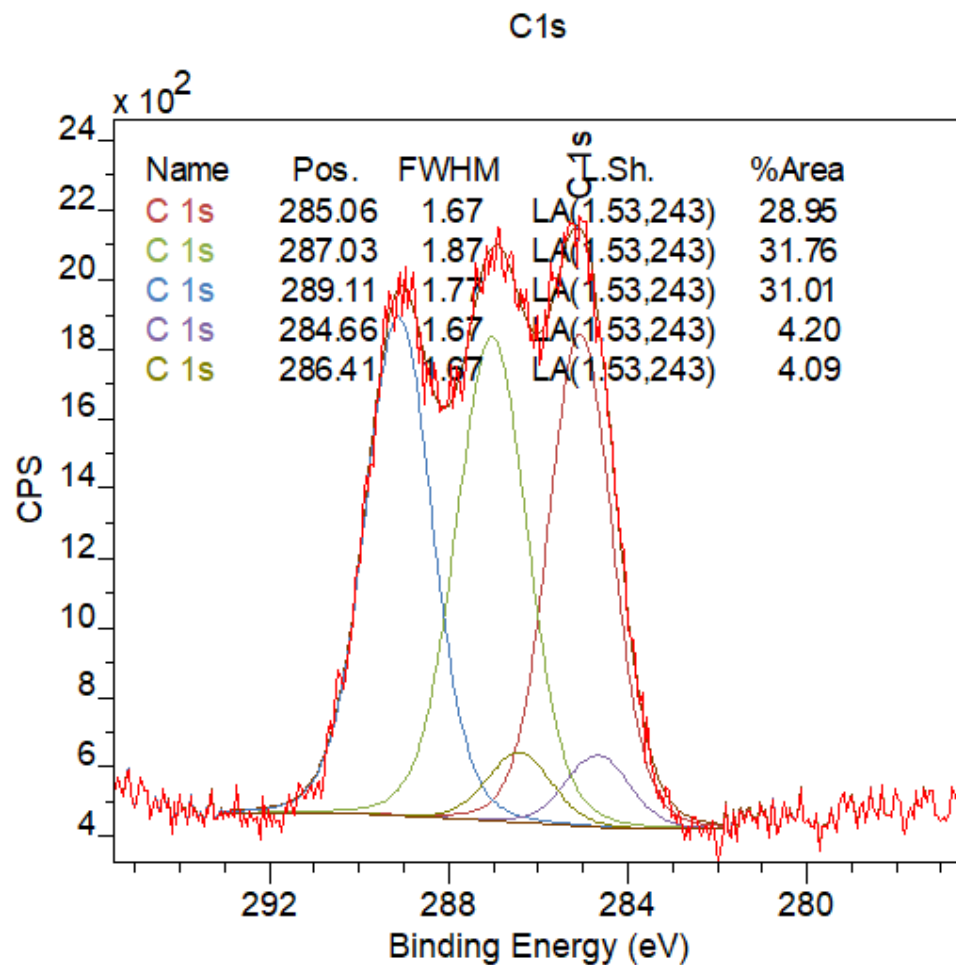

CasaXPS (This string can be edited in CasaXPS.DEF/PrintFootNc

Figure S4. XPS C1s spectra of PLLA\_UV\_SBF\_1d

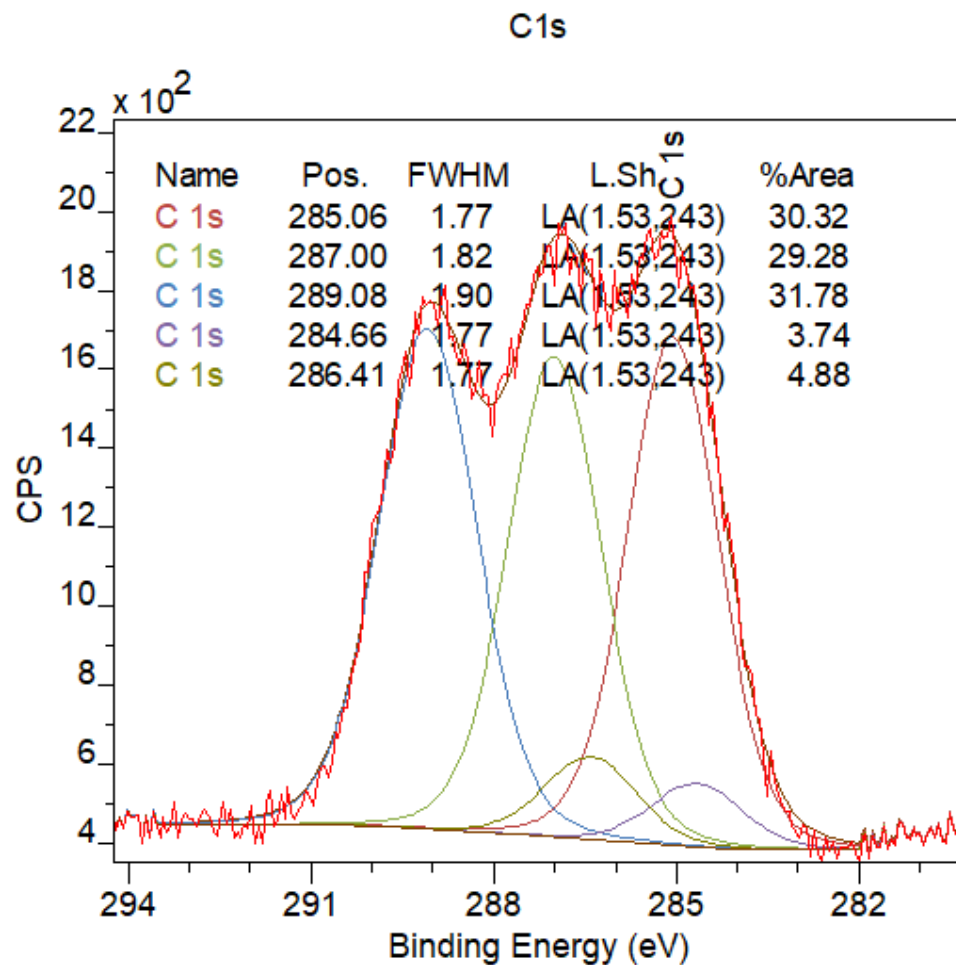

CasaXPS (This string can be edited in CasaXPS.DEF/PrintFootNc

Figure S5. XPS C1s spectra of PLLA\_UV\_SBF\_7d

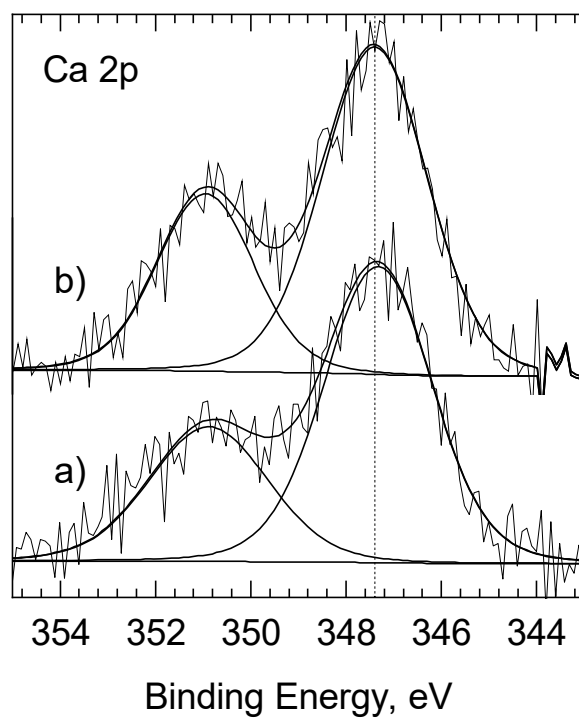

Figure S6. Ca 2p core level spectra for a) PLLA\_UV\_SBF\_1d and b) PLLA\_UV\_SBF\_7d
